# Supplementary material for: Case report: An unusual presentation of intra-abdominal desmoplastic small round cell tumor
Source: PubMed Central journal article supplement (PMC10910504; doi:10.3389/fonc.2024.1260474), 2024-02-19

## Supplemental Figure 1: Relevant timeline of events

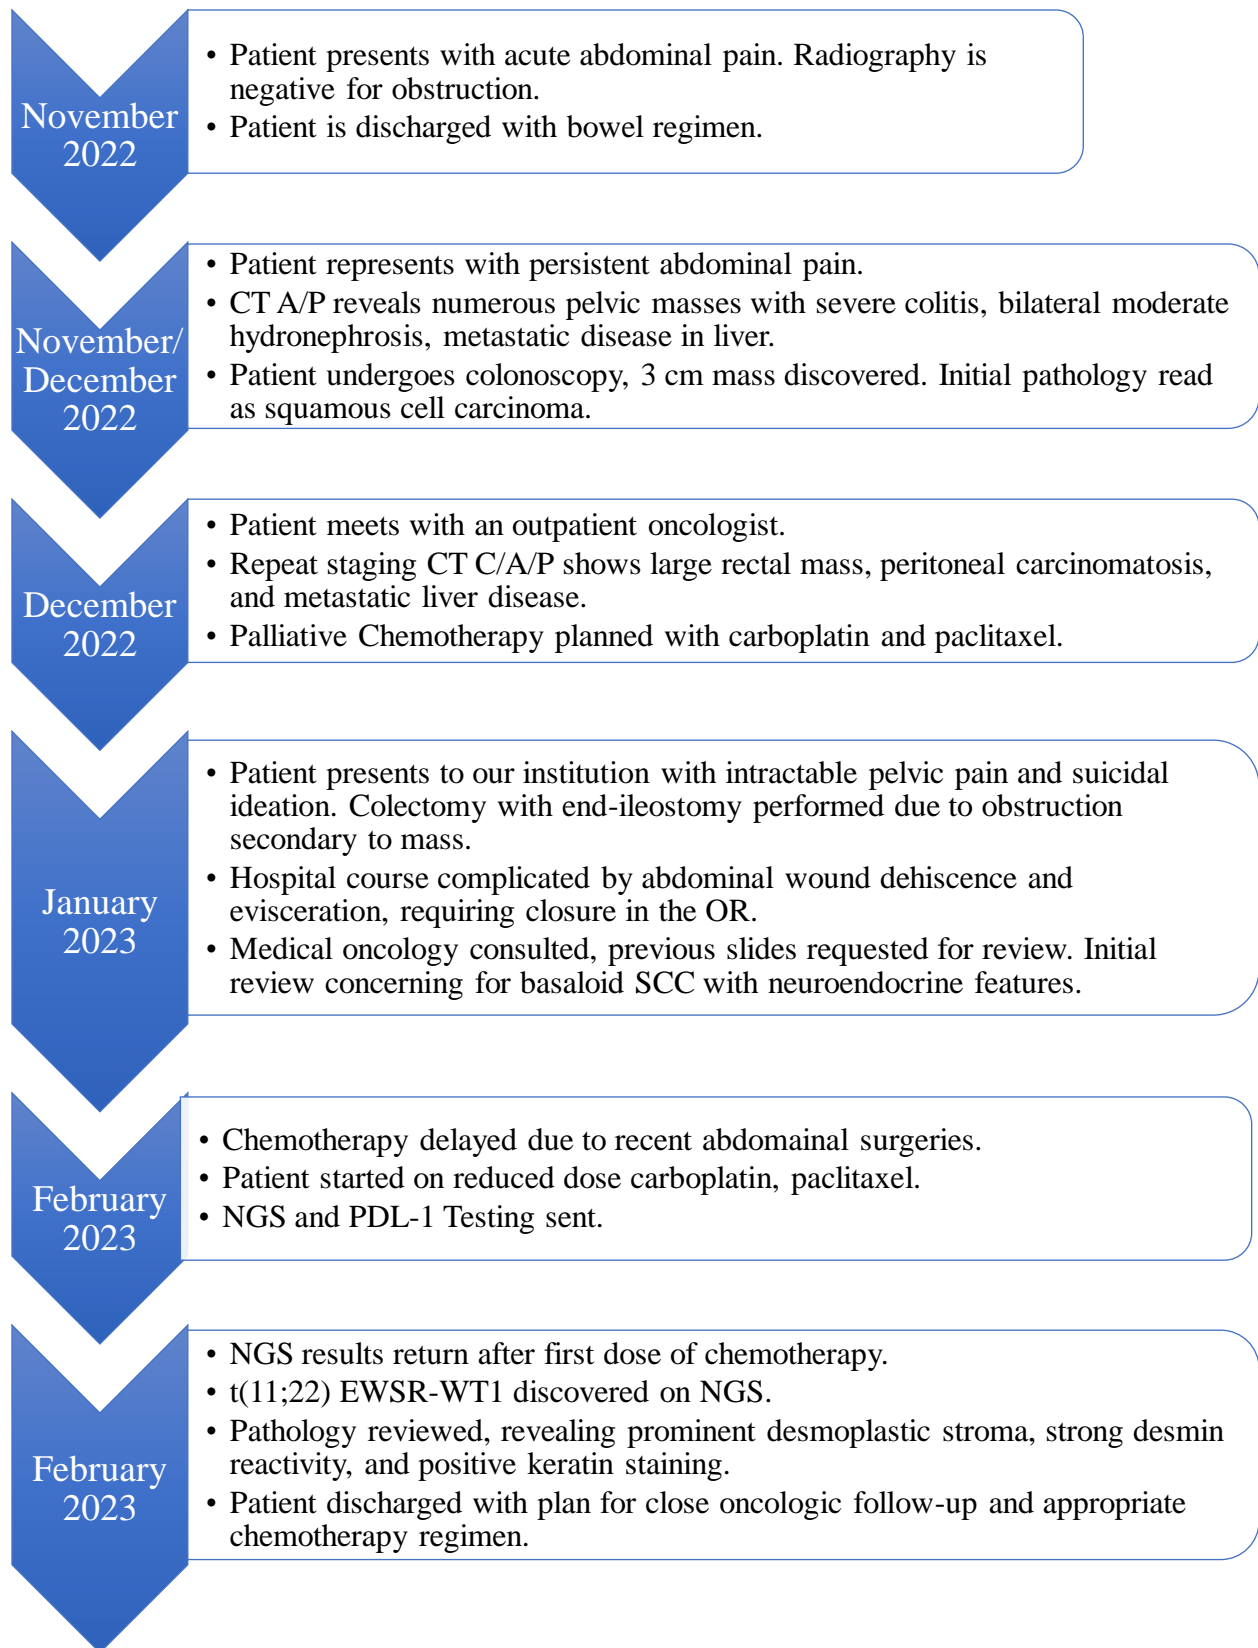

Supplement: Image_1.pdf [file Image_1.pdf]
